# Supplementary material
Source: Copernicus journal article supplement (doi:10.5194/egusphere-2026-1641)
Supplement: Supplementary file [file egusphere-2026-1641-RC1-supplement.pdf]

## Technical corrections

### Examples of sentences to shorten or simplify

Line 32-34 - “As the Data Request concept has evolved, ... the top-level objective of the DR ~~and those tasked with its development and management~~” shorten sentence, the last part is redundant

Lines 53-55 - Sentence “While the collation of CMIP7 data ... including non-AFT CMIP7 simulations.” seems to repeat same concept as lines 43-44 “CMIP7 experiment design, simulation .. CMIP community”

Some sentences could benefit would flow better with active verbs rather than passive. In particular the Data Request itself is an “actor” more often as for its own nature it can include, support, provide, impose etc. as in the following line

Line 73 - “To further support the usability ..” potentially rephrase as “To further support usability, DR7 introduces a Core request containing a relatively ..”

Line 84 - “most critical evaluations expected to be considered by Working “ simplify?

Line 91-92 Simplify “By broadening DR7 beyond the initial AFT phase of CMIP7, ~~it can~~ {would provide/provides} ongoing ..”

Line 105 - “against specific {community} requirements ~~set through community consultation~~”

Line 240 - “that detailed the ~~intended~~ strategic approach”

Line 249-250 - this sentence is bit unclear, maybe rephrase “..with ~~the~~ 97 variables classified as low to medium data volumes ~~will~~ <to> be requested from all CMIP7 experiments and ensemble members.”

Line 363 - “Steering Groups included representation from a comprehensive range of WCRP bodies, and were formed by invitation (see Table 1)” Mostly repeating previous sentence.

Line 406-409 Reverse order of sentence so main meaning doesn't get lost as in “The Task Team held a number of ... to interact with the request; alongside the information released via the CMIP website, in emails and ..” Potentially also split into two separate sentences

Line 454 - Simplify “Therefore, ~~the Task Team proposed~~ only the highest volume Opportunities were encouraged to request Time Subsets, while ..”

Line - 646-647 - “There was a significant evolution in content over these versions<,> but <they> provided information for modelling centres to begin configuring AFT workflows.

Line 723-724 - “highlighting the intended outcomes and impacts intended by the DR TT “  
redundant

Line 806 - “By structuring DR7 into modular Opportunities, it is amenable to the addition of new Opportunities, with the DR7 API allowing users to combine future requests with the present request, including those developed by Community MIPs within the DR7 framework as CMIP7 continues beyond the AFT.” Could potentially shorten sentence as the last part is implied by previous sentences.

## Technical corrections - typos

- Line 64 - “from which it they are requested”
- Line 85 - “is the creation and consolidated <consolidation?>of a set “
- Line 89 - “and Community MIPs have also developed experiments” or “will develop”?
- Line 113 - “the major shift in for CMIP7” remove one of the prepositions
- Line 120 - “Adaption by the MIP community” adoption?
- Line 150 - “of Earth system models (ESMs) “ → “of Earth System Models (ESMs)”
- Line 173 - “A community-wide CMIP6 survey <was> conducted by the CMIP IPO in March 2022 and summarised in O’Rourke (2024). “ or join with following sentence
- Line 178 - “felt there <were> too many priority”
- Fig 2 caption “The arrows between categories <are/indicate> the primary mode ”
- Line 257 - “of the AFT,< >the” add space
- Line 294 - “The CF convention<s> includes” to be consistent with previous lines
- Line 310 - same issue as line 294
- Line 361-362 - “~~who~~ whose role”
- Caption table1 - “~~while for~~ Impacts&Adaptation column 5 also includes industry sectors “
- Line 610 - “estimate which variable<s> are expected to be published to CMIP7”
- Line 619 - “operated on the ~~principal~~ <principle> of delivering in time ”
- Line 620 - “As release dates approach<ed>, it was necessary ... all development activities delivering<ed> to the release ”
- Line 711-712 - “The challenge ~~has been~~ <is> to ensure that the expanding” for consistency with other sentences in the paragraph
- Line 770 - “step change in ~~the~~ how the Data Request is created”
- Line 800 - “approach considered ~~of~~ the evolving and future”
