# Supplementary material
Source: Copernicus journal article supplement (doi:10.5194/egusphere-2026-1641)
Supplement: Supplementary file [file egusphere-2026-1641-RC2-supplement.pdf]

## Technical corrections

Line 50 change to “DR7-dev contains...”

Line 173 change to “was conducted”

Line 176, remove the comma before “should be”

End of Line 257, add a space between the comma and the word “the”

Line 280 change to “Approve that there *are* both...”

Line 288 change to “Approve that the Data Request *core component* will...”

Line 289 change to “Approve in principle that the harmonised variable list *will be* created”

Line 308 change to “slowing the addition of new vocabulary terms *and* increasing burden on CF moderators”

Line 361-362 change to “*whose* role was to guide and support...” (delete the “who” on Line 361)

Line 572 change to “*due to* its simpler design.”

Line 619, change to “Planning throughout DR7-dev operated on the *principle* of delivering in time...”

Line 915, fix the hyperlink to Fleming et al. (2023)
